# Supplementary material
Source: Springer Nature journal article supplement (https://www.springermedizin.de/resource/supplementary/12890_2013_418_MOESM1_ESM.pdf/9505170)

**A**

Exhaled ethanol (ppb)

800  
600  
400  
200  
0 $p=0.03$ 

5L/min 10 L/min

**B**

Exhaled acetone (ppb)

3  
2  
1  
0 $p>0.05$ 

5L/min 10 L/min

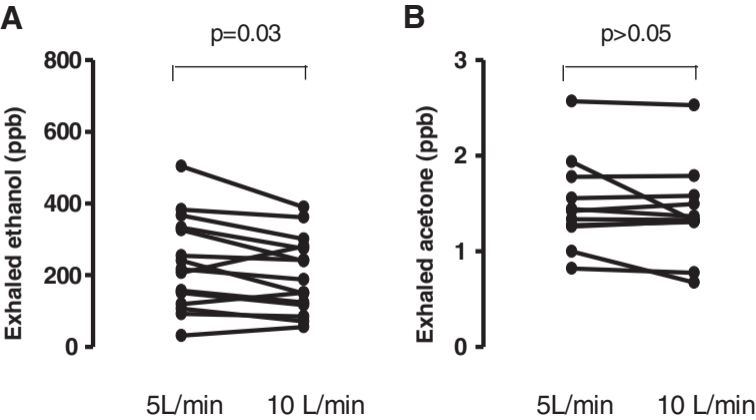

Supplement: MOESM1 [file 9505170]
